# Supplementary material for: Analysis of the effects of Cu-MOFs on fungal cell inactivation
Source: Royal Society of Chemistry journal article supplement (doi:10.1039/d0ra08743b), 2021-01-01
Supplement: d0ra08743b1.pdf [file d0ra08743b1.pdf]

*Supplementary Information*

**Analysis for the effects of Cu-MOFs on fungal cell inactivation**

*Mayura Veerana, †<sup>a</sup> Hyun-Chul Kim, †<sup>b</sup> Sarmistha Mitra,<sup>a</sup> Bishwa Chandra Adhikari,<sup>a</sup>*

*Gyungsoon Park,<sup>\*a</sup> Seong Huh,<sup>b</sup> Sung-Jin Kim,<sup>c</sup> and Youngmee Kim<sup>\*c</sup>*

*<sup>a</sup> Plasma Bioscience Research Center and Department of Electrical and Biological Physics, Kwangwoon University, Seoul 01897, Republic of Korea. E-mail: [gyungp@kw.ac.kr](mailto:gyungp@kw.ac.kr)*

*<sup>b</sup> Department of Chemistry and Protein Research Centre for Bio-Industry, Hankuk University of Foreign Studies, Yongin 17035, Korea*

*<sup>c</sup> Institute of Nano-Bio Technology and Department of Chemistry and Nano Science, Ewha Womans University, Seoul 120-750, Korea. E-mail: [ymeekim@ewha.ac.kr](mailto:ymeekim@ewha.ac.kr); Fax: +82-2-3277-2385; Tel: +82-2-3277-4164*

*† These authors contributed equally to this work.*

Correspondence and requests for materials should be addressed to Y.K. (email: [ymeekim@ewha.ac.kr](mailto:ymeekim@ewha.ac.kr)) or to G.P. (email: [gyungp@kw.ac.kr](mailto:gyungp@kw.ac.kr)).

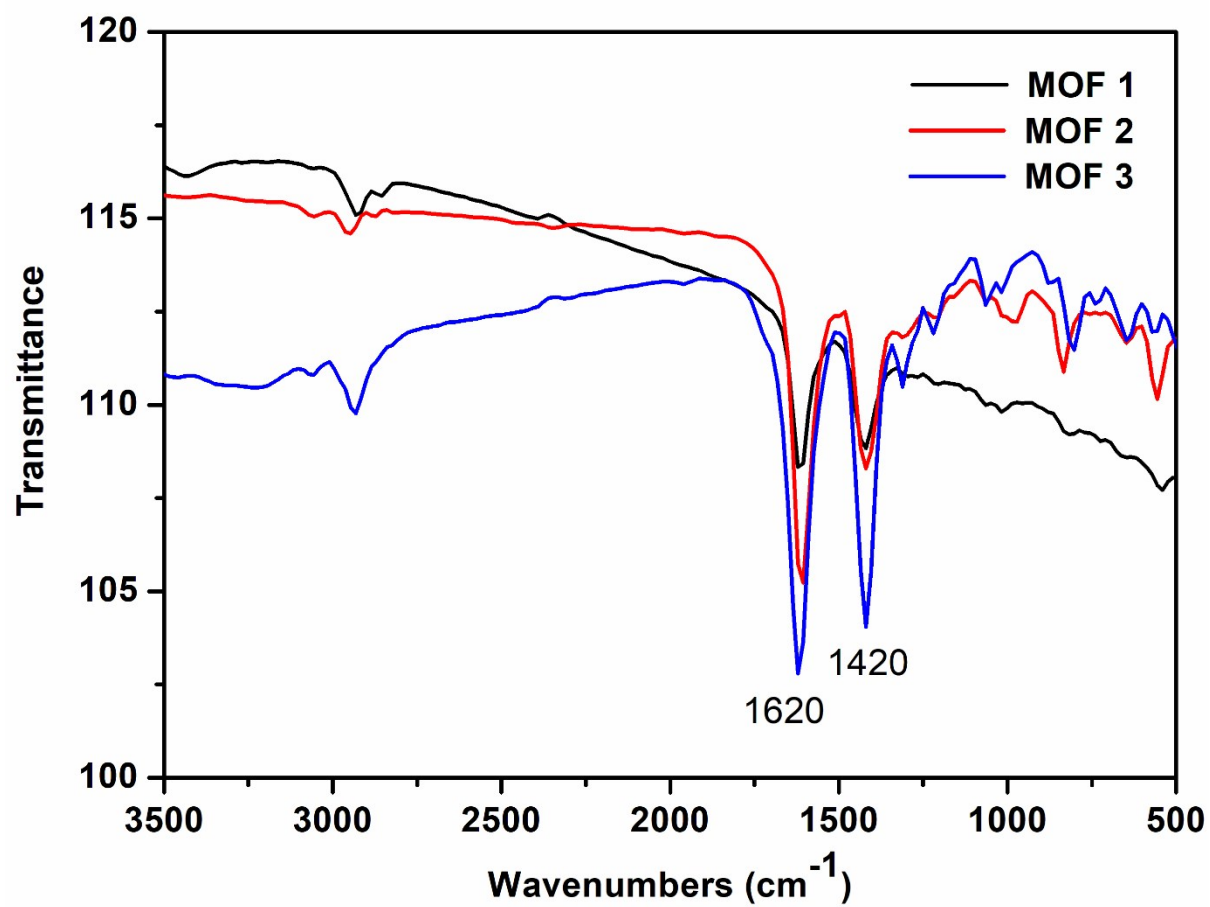

Fig. S1. IR spectra of of Cu-MOFs 1 - 3.

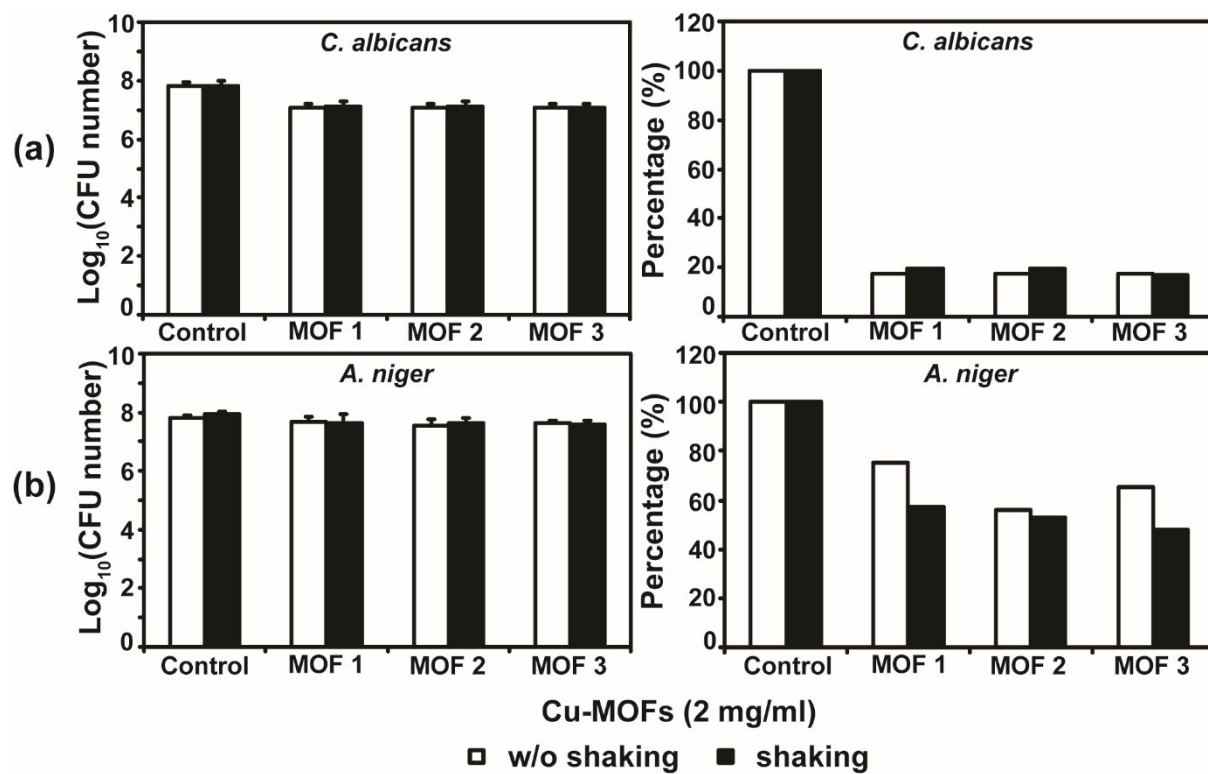

Fig. S2. Effect of collision after shaking Cu-MOFs on viability of *C. albicans* (a) and *A. niger* (b) cells at 4 days.

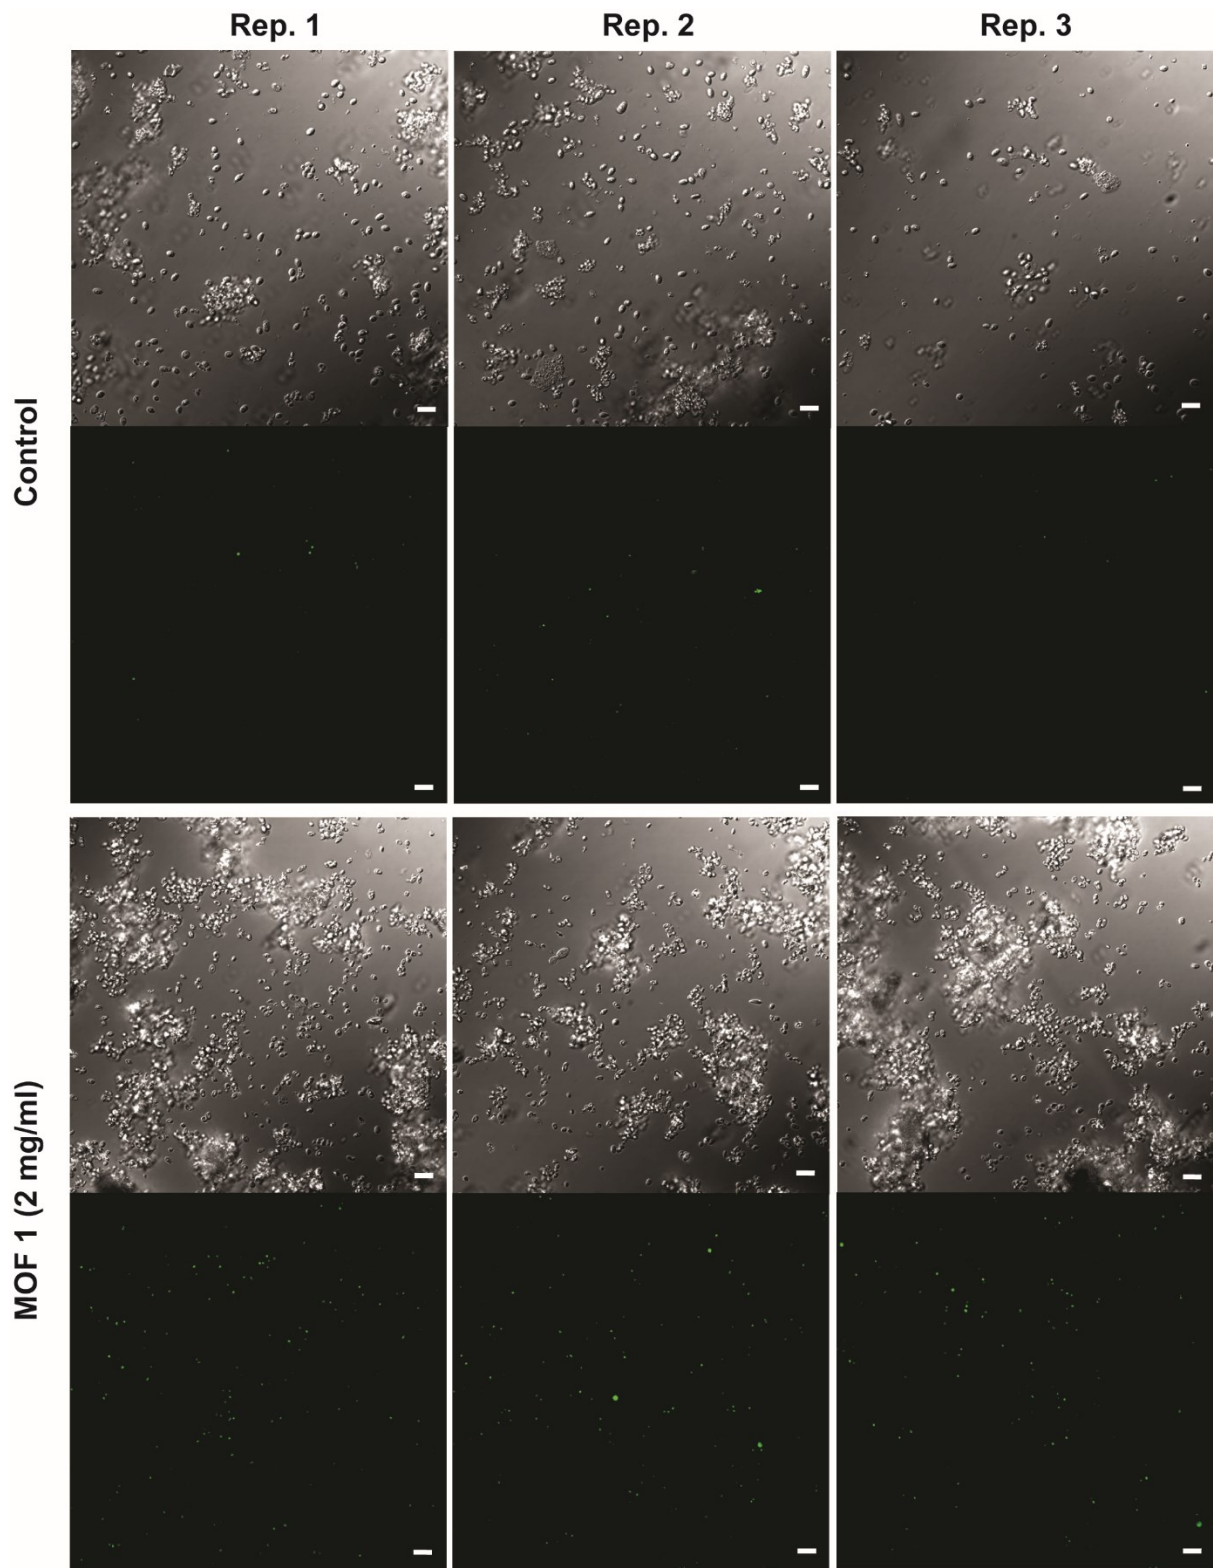

Scale bar = 10  $\mu$ m

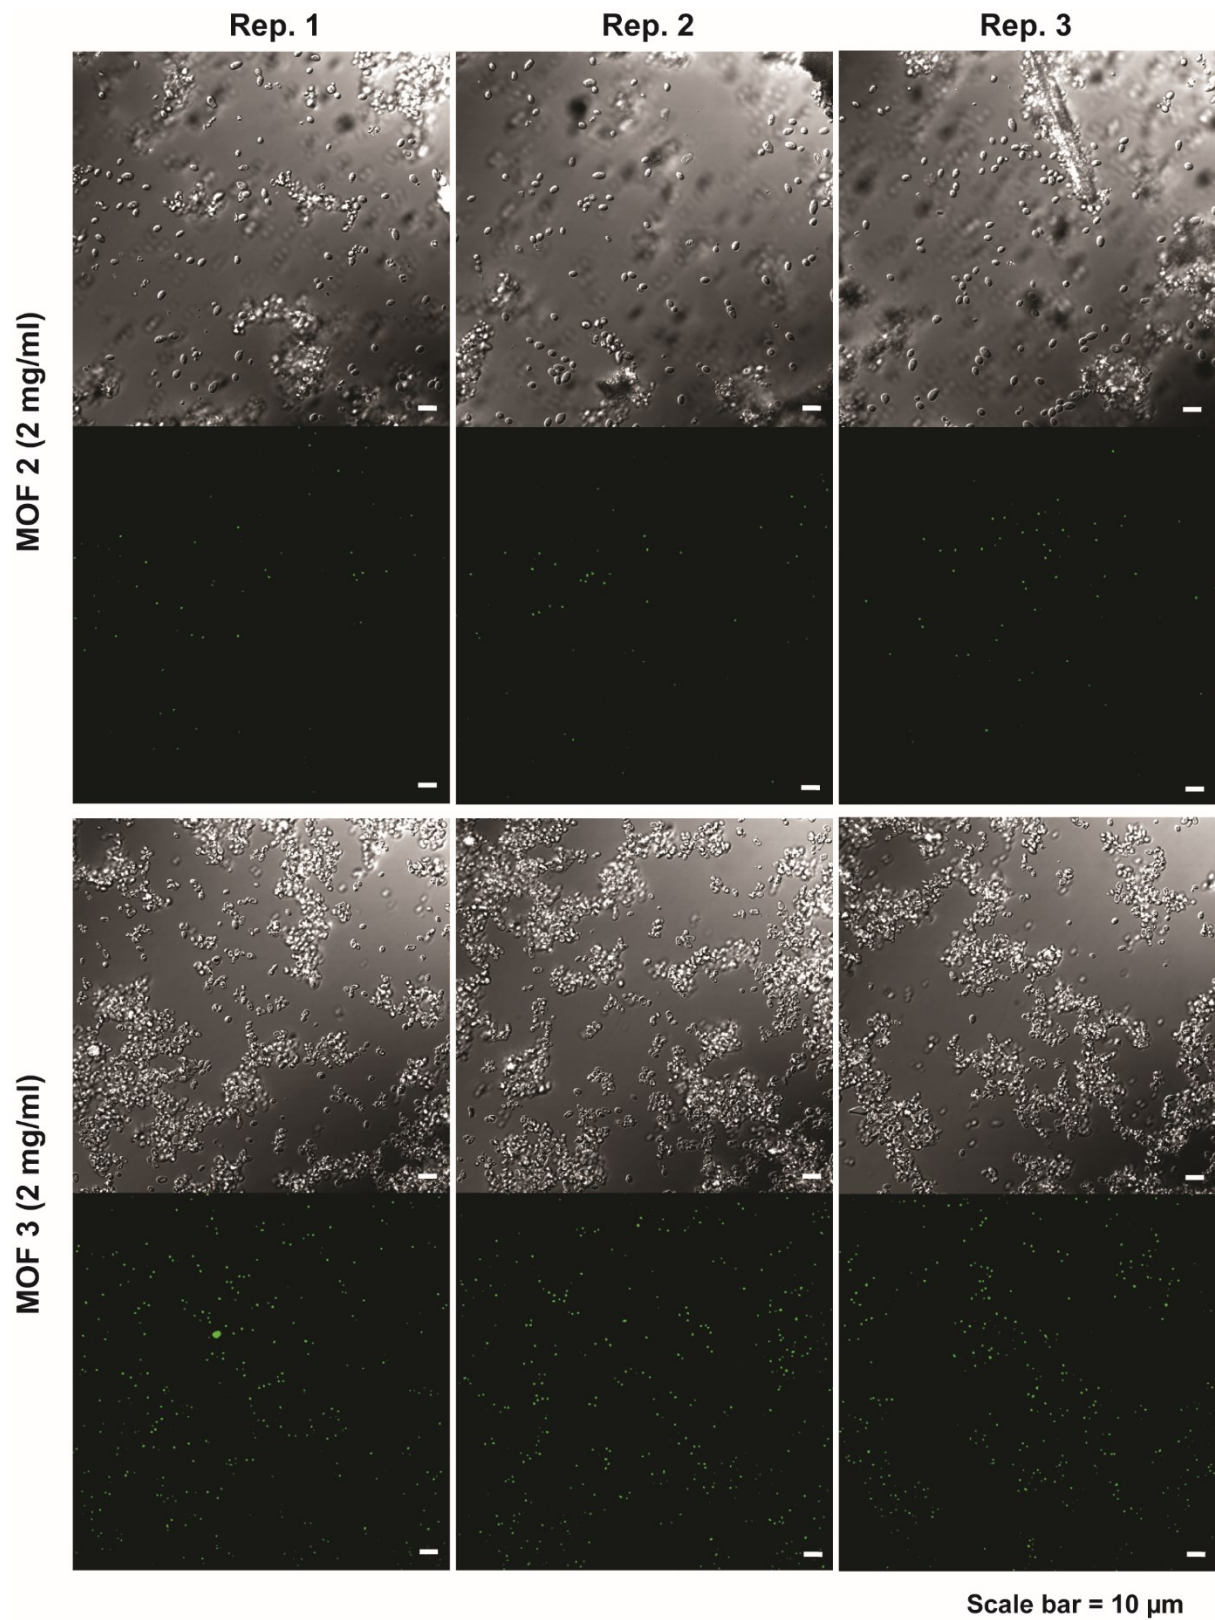

Fig. S3. TUNNEL assay showing apoptosis-like cell death in *C. albicans*.

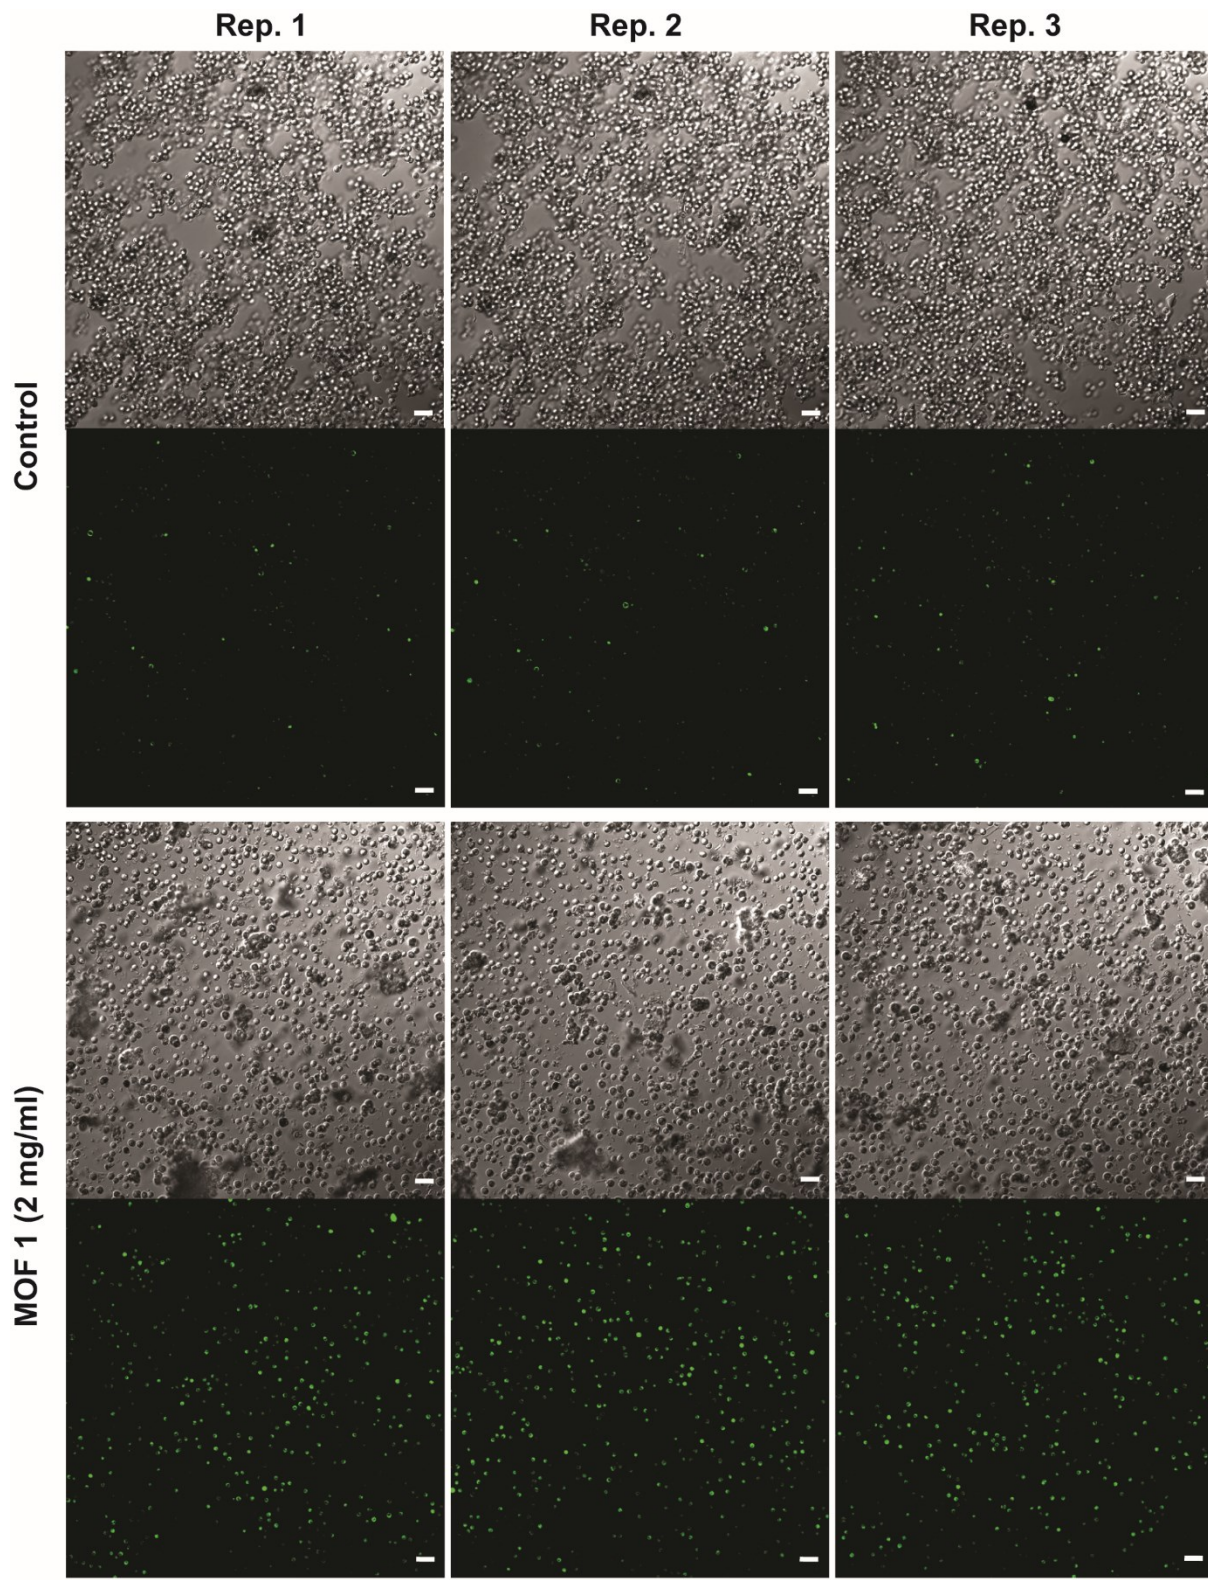

Scale bar = 10  $\mu$ m

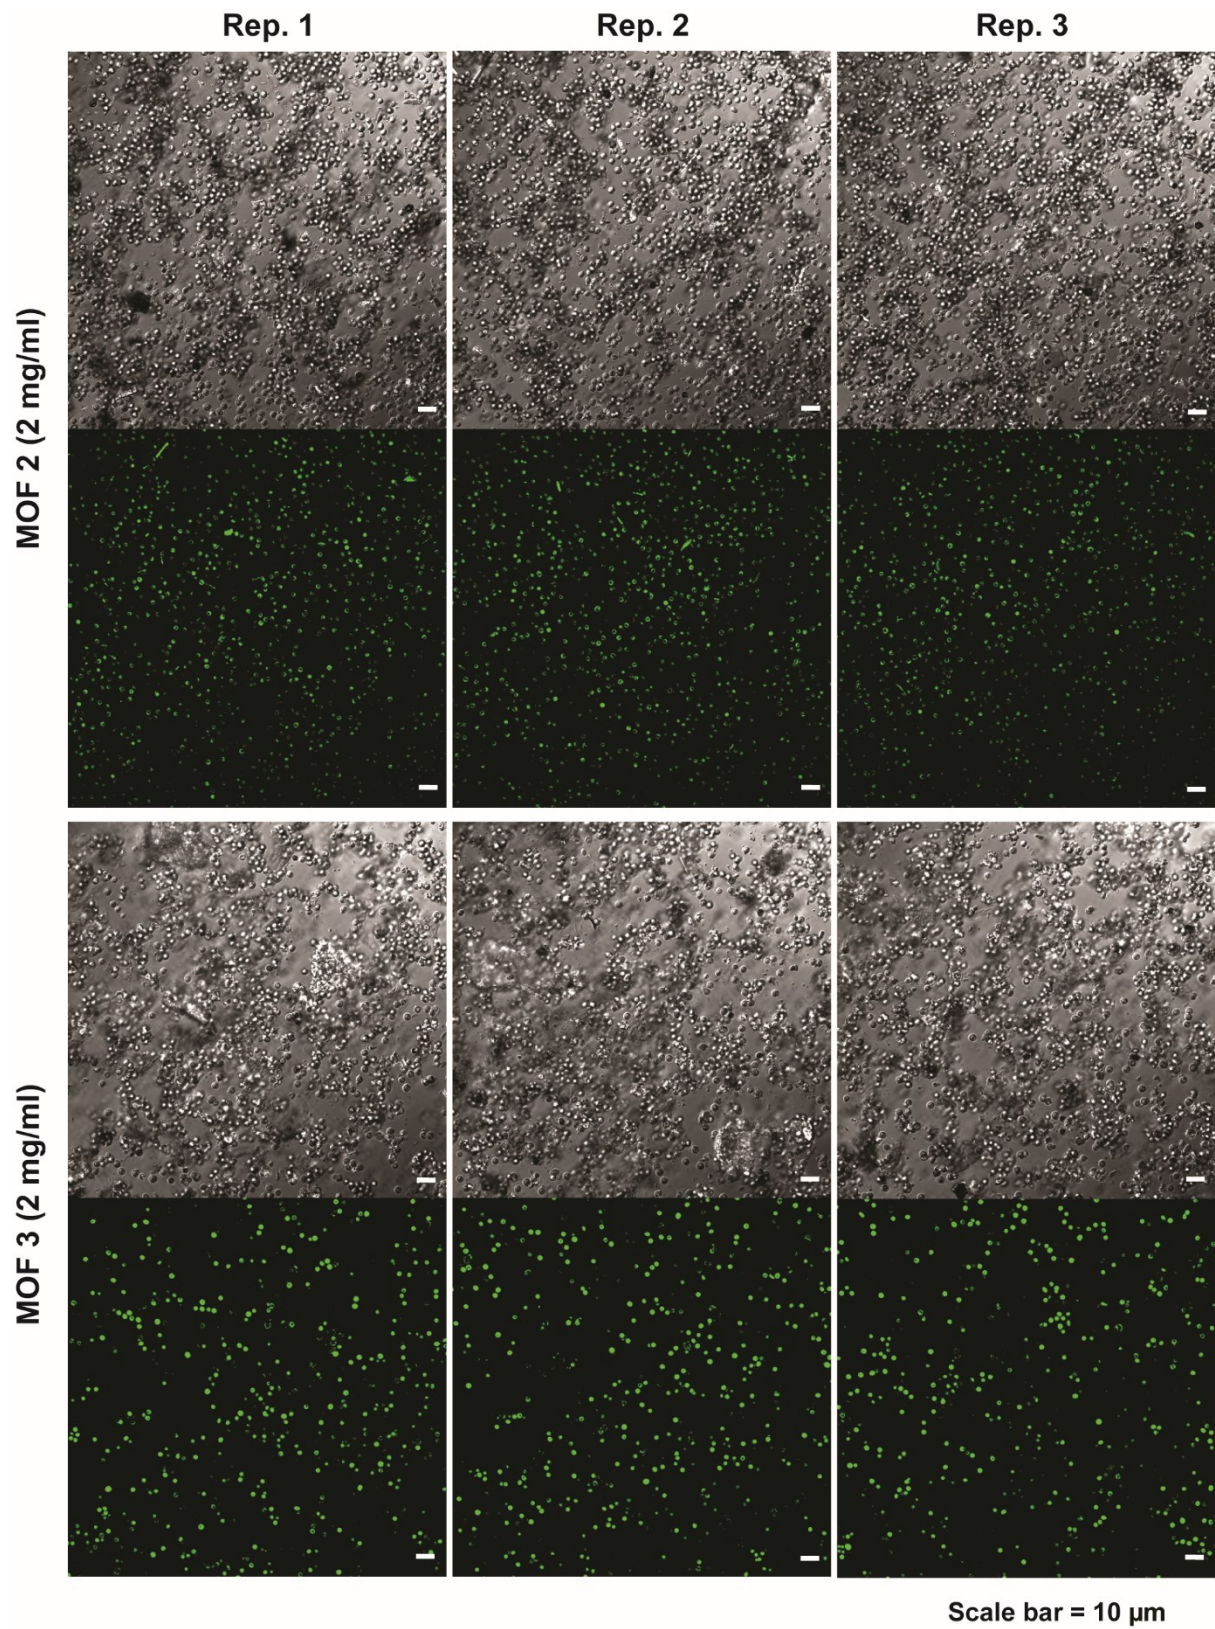

Fig. S4. TUNNEL assay showing apoptosis-like cell death in *A. niger*.
